# Supplementary material for: DNA Quantity and Quality Comparisons between Cryopreserved and FFPE Tumors from Matched Pan-Cancer Samples
Source: MDPI journal article supplement (doi:10.3390/curroncol31050183), 2024-04-28
Supplement: s1 [file s1]

**Supplemental Figure S1**

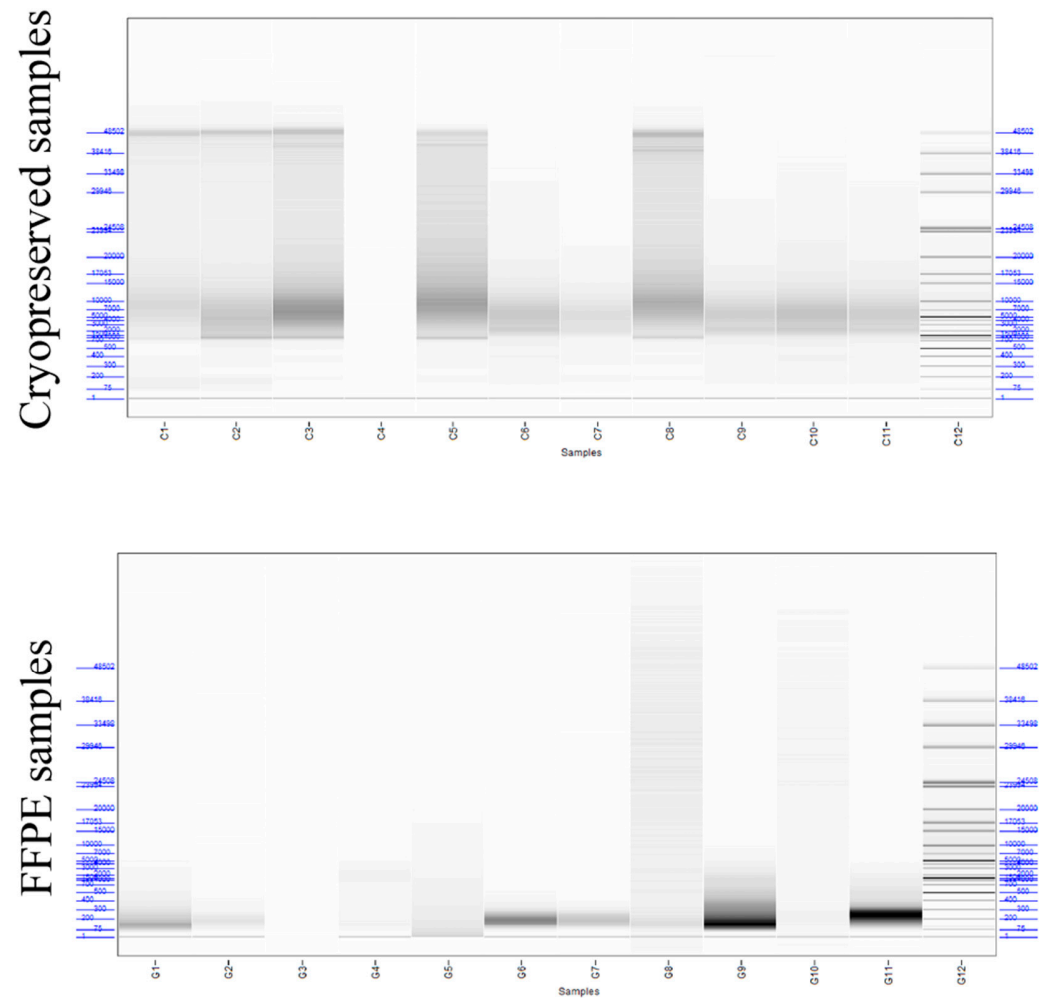

**Supplemental Figure S1.** DNA gel images comparing cryopreserved samples and FFPE samples. 11 samples shown for each. The far right lane is the standard ladder ranging from 1 bp to 48,502 bp.

Supplemental Figure S2

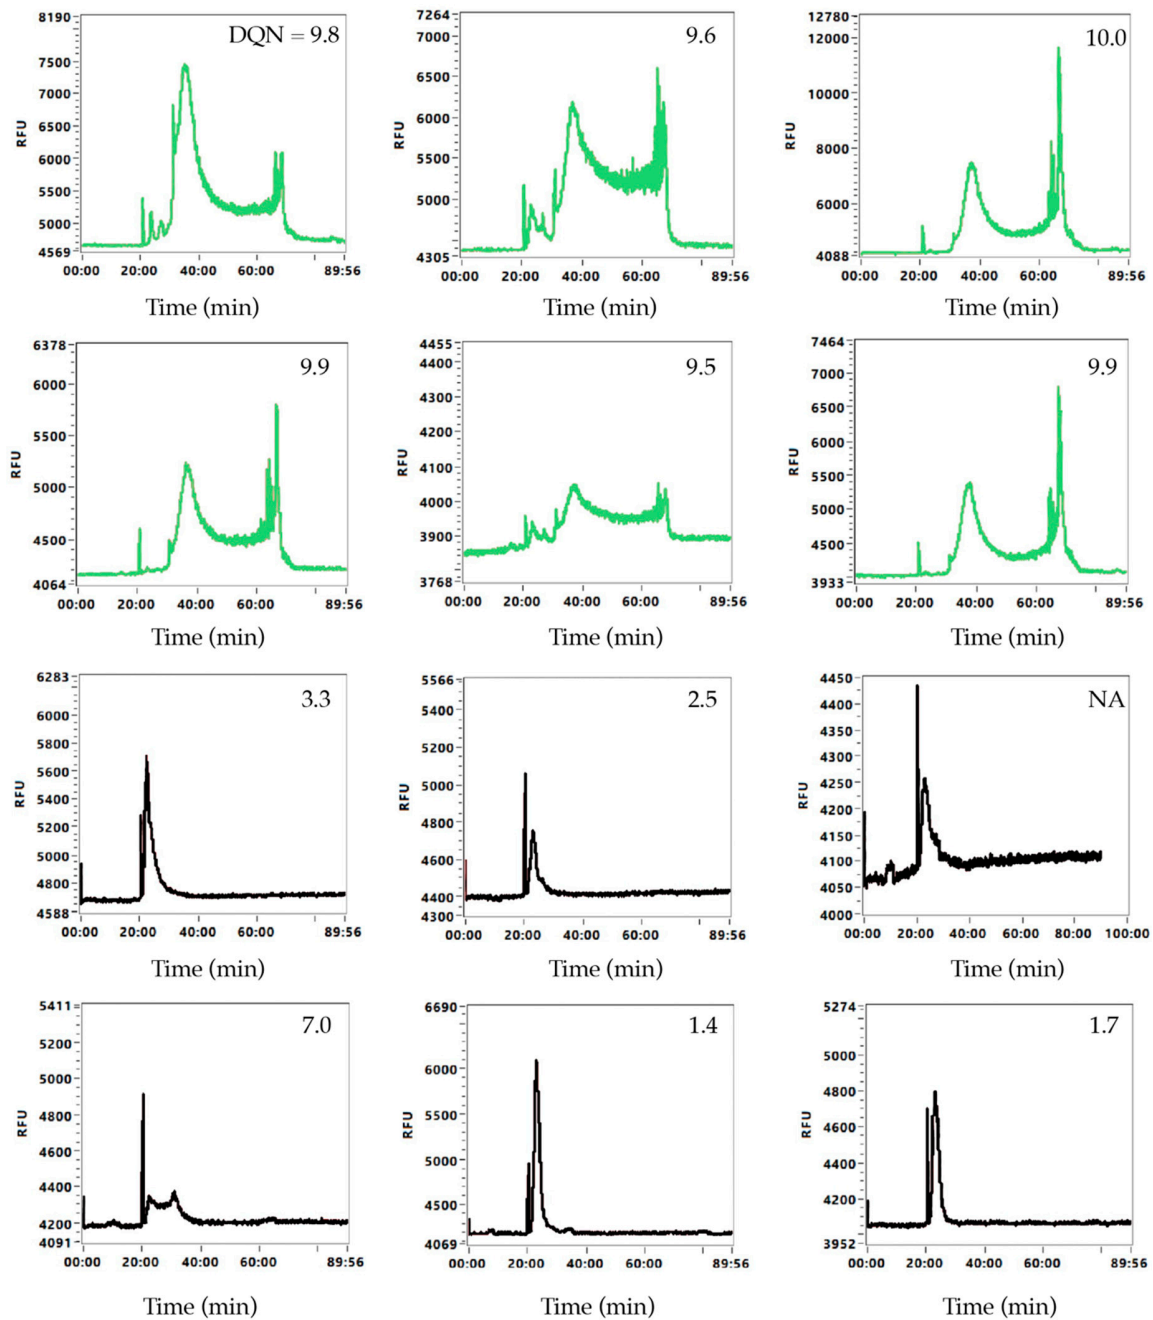

**Supplemental Figure S2.** Extended examples of electropherograms for cryopreserved samples (green) and FFPE samples (black). These graphs were used to calculate the AUC > 40,000 bp (62:00). The DNA quality number (DQN) is provided in the upper right corner of each graph.
